# Supplementary material for: Identification of 14-3-3 Family in Common Bean and Their Response to Abiotic Stress
Source: PLoS One. 2015 Nov 23;10(11):e0143280. doi: 10.1371/journal.pone.0143280 (PMC4658069; doi:10.1371/journal.pone.0143280)
Supplement: S1 Table — (XLSX) [file pone.0143280.s002.xlsx]

## Sheet: Sheet1
Table S1 The accession numbers of GF14 proteins used in the study
GF14 ID	Accession number	GF14 ID	Accession number
AtGF14kappa	AAD51783	GmGF14h	NP_00123838
AtGF14lambda	AAD51781	GmGF14i	XP_003526571
AtGF14chi	AAA96254	GmGF14j	XP_003526536
AtGF14phi	AAB62224	GmGF14k	XP_003544808
AtGF14omega	AAA96253	GmGF14l	XP_003531255
AtGF14nu	AAD51782	GmGF14m	NP_001236005
AtGF14upsilon	AAB62225	GmGF14n	NP_001238592
AtGF14psi	AAA96252	GmGF14o	NP_001242151
AtGF14mu	AAD51784	GmGF14p	NP_001238592
AtGF14iota	AAK11271	GmGF14q	NA1
AtGF14omicron	AAG47840	GmGF14r	NA1
AtGF14epsilon	AAD51785	OsGF14a	AAO72553
AtGF14pi	NP_565174	OsGF14b	AAB07456
GmGF14a	NP_001235653	OsGF14c	AAB07457
GmGF14b	XP_003522755	OsGF14d	AAB07458
GmGF14c	NP_001235679	OsGF14e	CAB77673
GmGF14d	NP_001237065	OsGF14f	AAX95656
GmGF14e	NP_001238423	OsGF14g	BAD73105
GmGF14f	NP_001238407	OsGF14h	ABA94733
GmGF14g	NP_001239690
1 refers to that none of protein sequence was found in NCBI database but the protein sequence was deduced according to its CDS sequence available at Phytozome database.
